# Supplementary material
Source: PubMed Central journal article supplement (PMC2782042)
Supplement: supp_M109.006049_jbc.M109.006049-1.pdf [file supp_M109.006049_jbc.M109.006049-1.pdf]

## SUPPLEMENTARY FIGURE LEGENDS

Supplementary Fig. 1. Multiangle light scattering analysis of purified OatWY. OatWY forms a trimer in solution.

Supplementary Fig. 2. Multiple sequence alignment of OatWY with other bacterial *O*-acetyltransferases. Conserved catalytic residues (His121 and Trp145') are highlighted in *grey*. The numbering of the *N. meningitidis* sequence is shown. Residues involved in the protruding loop region are italicized, underlined, and highlighted in *grey*. Sequence alignments were calculated using the program ClustalW (55). Sequences from the following bacterial species are shown (TrEMBL accession code: OatWY–*N. meningitidis* serogroup Y (Q93S40), NeuO–*E. coli* K1 (Q58WP5), VatD–*E. faecium* (P50870), MAT–*E. coli* K1 (P77791), PaXAT–*P. aeruginosa* (Q02HJ8), GAT–*E. coli* K1 (P07464)).

Supplementary Figure 1

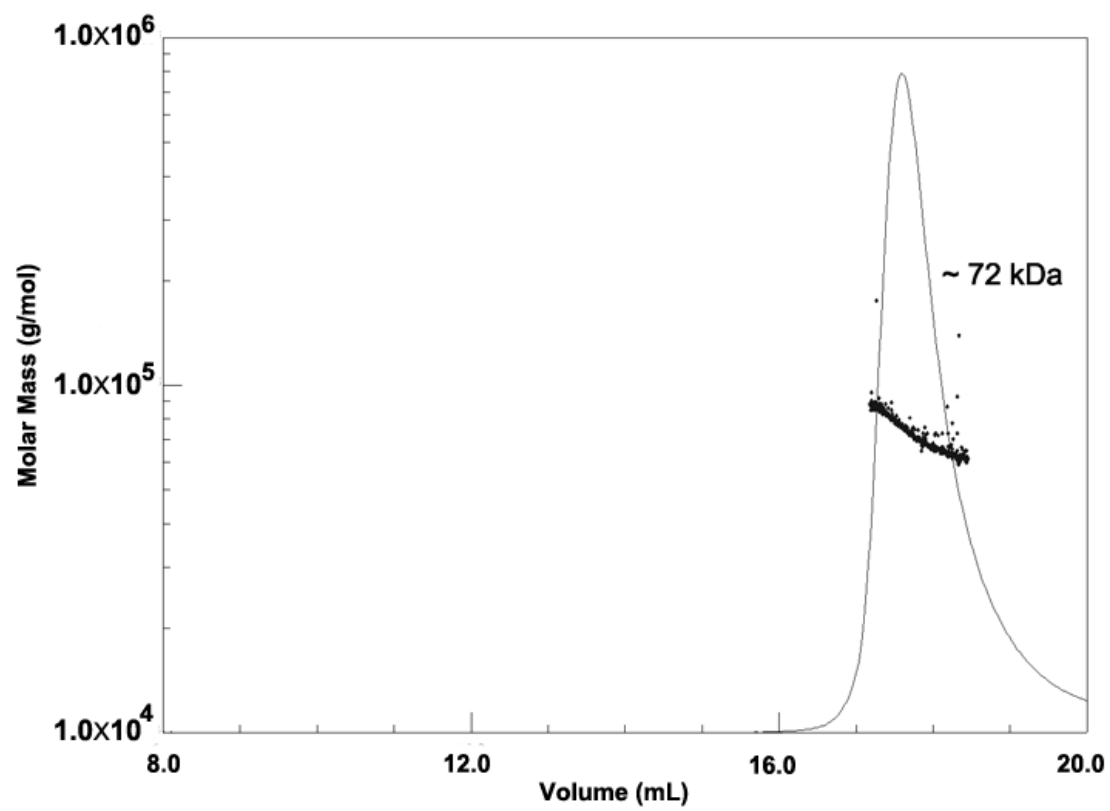

Supplementary Figure 2

```

OatWY-N.mening -----MGTHMYSEQINNTINISTTSLTNAQTQITVIGNNNSVYIGNNCKIVSSNI 50
MAT-E.coli -----STEKEKMIAGELYRSADETLSDRLRARQLIHRYNHSLAEE 41
GAT-E.coli -----MNMPMTERIRAGKLFDMCEGLPEKRLRGKTLMYEFNHSHPSE 43
VatD-E.faecium -----MGPMPKMYPIEGNKSVQFIKPILEKLENVEVGEYSYD-SKNG 43
PaXAT-P.aerug -----MG--NYFESPFRGKLLSEQVS-----NPNIRVGRYSYSGYYHG 37
NeuO-E.coli K1 MLRLKTQDSRLKTQDSRLKTQDSRLKTQDSRLKTQDSRLKTQDSRLKTQDSRL 60

OatWY-N.mening RLKGNITLFIADDVENMG-----LVCSLHSDC 78
MAT-E.coli HTLRQQILADLFGQVTE-----AYIEPTFRCDYGYNI 73
GAT-E.coli VEKRESLIKEMFATVGEN-----AWVEPPVYFSYGSNI 76
VatD-E.faecium ETFDKQILYHYPIILN-----DKL 61
PaXAT-P.aerug HSFDDCARYLMPDRDDV-----DKL 57
NeuO-E.coli K1 KTQDSRLKTQDSFSDVDDNGSGNVFVCGDLVNSKENKVQFNGNKKLIIEDDVECRWLTVI 120

OatWY-N.mening SLQIQAKTTMGN-----GEITIAEKGKISIGKDCMLAHG 112
MAT-E.coli FLGNFFANFD-----CVMLDVCPIRIGDNCMLAPG 104
GAT-E.coli HIGRNFYANFN-----LTIVDDYTVTIGDNVLIAPN 107
VatD-E.faecium KIGK--FCSIG-----PGVTIIMNG-ANHRMDGSTY 89
PaXAT-P.aerug VIGS--FCSIG-----SGAAFIMAGNQGHRAEWAST 86
NeuO-E.coli K1 ERGDNNYVRIHKNSKIKGDIVATKGSKVIIGRRTTIGAGFEVVTDKCNVTIGHDCMIARD 180

OatWY-N.mening YEIR121NTDMHP145IYSL171ENGERINHGKDVII145GNHVW171LGRNVTILKGVCI171PNNVVVGSHTVLYK 172
MAT-E.coli VHIYTAT-HPIDPVARNSGAELGKPVTTIGNNVWIGGRAVINPGVTIGDNVVASGAVVTK 163
GAT-E.coli VTLSVTG-HPVHHELRLKNGEMYSFPITIGNNVWIGSHVINPGVTIGDNSVIGAGSIVTK 166
VatD-E.faecium PFNLFGN-GWEKHMPKLDQLPIKGD145TII171GN171DVWIGKDVVIMPGVKIGDGAIVAANSVVVK 148
PaXAT-P.aerug FPFHFMH-EEPAFAGAVNGYQ145PAGDTLIGHEV171WIGTEAMFMPGVRVGHGAIIGSRALVTG 145
NeuO-E.coli K1 VILRASDGHPIFDIHSKKRINWARDII145SSYV171WVGRNVSIMKGVSVGSGSVIGYGSIVTK 240

OatWY-N.mening SFKEPNCVIAGSPAKIVKENIVWGRKMYHSTMYDDPTLNEFYK----- 215
MAT-E.coli DVP-DNVVVGGNPARI145IKKL----- 182
GAT-E.coli DIP-PNVVAAGVPCRVIREINDRDKHY171YFKDYK171V171ESSV----- 203
VatD-E.faecium DIA-PYMLAGGNPANEIKQRF145QDTINQLLDIKW171NPIDIINENIDKILDNSIIREVIW 207
PaXAT-P.aerug DVE-PYAI145VGGNPARTIRK171RFS171GD171IQN171LLEMAW171WD171PLADIEAAMPL171CTGDIPALYQH 204
NeuO-E.coli K1 DVP-SMCAAAGNPAKI145IKRNI171IWARTDKAELISDDKRCSSYHAKLTQ----- 286

OatWY-N.mening -----
MAT-E.coli -----
GAT-E.coli -----
VatD-E.faecium KK----- 209
PaXAT-P.aerug WKQRQATA 212
NeuO-E.coli K1 -----

```
